# Supplementary material
Source: PubMed Central journal article supplement (PMC5063660)
Supplement: NIHMS773041-supplement.pdf [file NIHMS773041-supplement.pdf]

|     |     |                                                                                                                        |     |      |                                                                                                           |
|-----|-----|------------------------------------------------------------------------------------------------------------------------|-----|------|-----------------------------------------------------------------------------------------------------------|
| oG  | 1   | ATG <b>GTCCCA</b> CAGGCTCTC <b>CTCTCGTCCCTCTGCTGCTTCCCACTCTGCTTTGGT</b> A                                              | oG  | 1021 | <b>CTGATGAGGGCAGACGCCATTATAAATCTGTG</b> AGAAC <b>CTGGAATGAAATCATTCTAGT</b>                                |
| PBG | 1   | ATGGTTCTCAGGCTCTCCTGTTGTACCCCTTCTGGTTTTCCATTGTGTTTTGGGAAA                                                              | PBG | 1021 | TTGATGGAAGCCGATGCTCACTACAAGTCAGTCAGA <b>ACTT</b> GGAATGAGATCATCCCTCA                                      |
| oG  | 61  | TTCCCTAT <b>CTACACTATCCCC</b> GACAAG <b>CTGGGC</b> CCCTGG <b>AGTCTATCGATATCCACAT</b>                                   | oG  | 1081 | <b>AAGGGATGCCTGCGAGTC</b> GGGG <b>CTCGATGT</b> C <b>CCCCA</b> CT <b>GTG</b> AACGG <b>GTCTCTTTAAT</b>      |
| PBG | 61  | TTCCCTATTTACAGATACCAGACAAGCTTGGTCCCTGGAGCCGATTGACATACATCAC                                                             | PBG | 1081 | AAAGGGTGTAAAGAGTTGGGGGAGGTGTCTATCTCATGAAACGGGGTATTTTCAAT                                                  |
| oG  | 121 | <b>CTGTCA</b> TGC <b>CCTA</b> ACAAT <b>CTCGTGGT</b> CGAGGACGA <b>AGGCTGT</b> ACCAAC <b>CTGAGCGGATTC</b>                | oG  | 1141 | GGTAT <b>CATTCTGGGGCAGATGT</b> AAC <b>CTGTGAT</b> CCCCGAGAT <b>GCAGTCTAGTCTCTC</b>                        |
| PBG | 121 | CTCAGCTGCCAAACAATTTGGTAGTGGAGGACGAAGGATGCACCAACCTGTCAAGGTTTC                                                           | PBG | 1141 | GGTATAATATTAGGACCTGACGGCAATGTCTTAATCCAGAGATGCAATCATCCCTCCTC                                               |
| oG  | 181 | TCCTACAT <b>GGAGT</b> GAAA <b>GTGGGCTATATCTCTGCTATTAAG</b> ATGAACGGG <b>TTCA</b> TATGC                                 | oG  | 1201 | CAGCAG <b>CACATGGA</b> ACT <b>GTCTGTCAAGCGT</b> CATTCC <b>CTGATGCATCTCTCG</b> CAGAC                       |
| PBG | 181 | TCCTACATGGAAC <b>TTAAAG</b> TTGGATACATCTCAGCCATAAAAATGAACGGG <b>TTCACTTGC</b>                                          | PBG | 1201 | CAGCAACATATGGAGTTGGTATCTCGGTTATCCCTTATGCACCCCTGGCAGAC                                                     |
| oG  | 241 | <b>ACTG</b> GT <b>GTGGT</b> CACCGAG <b>GCA</b> GAAACCTAC <b>ACAAATTTTGGGGA</b> TATGTC <b>ACCACA</b> ACT                | oG  | 1261 | <b>CCAAGC</b> AG <b>GTGTTCAA</b> AAC <b>GGC</b> GACGAG <b>GCCGA</b> GATTT <b>GTGGAGT</b> CAC <b>CTGCC</b> |
| PBG | 241 | ACAGGCGTGTGACGGAGGCTGAACCTACACTAACTTCGTTGGTTATGTCACAACCACG                                                             | PBG | 1261 | CCGCTACCGTTTTCAAGAACGGTGACGAGGCTGAGGATTTTGTGAAGTTACCTTCCC                                                 |
| oG  | 301 | TT <b>CAAG</b> AGA <b>AAACACTTT</b> CGG <b>CCA</b> ACACCA <b>GACG</b> CT <b>GTGGG</b> CAGCTTACAAC <b>CTGGA</b> AG      | oG  | 1321 | <b>GAC</b> GTGCACGAACGGAT <b>CAGTGGCTCGATCTCGGACTGCCTAAT</b> TTGGG <b>CAAGTACG</b> TG                     |
| PBG | 301 | TTCAAAAGAAAGCATTTCGCGCCAACACAGATGCATGTAGAGCCGCTACAAC <b>CTGGA</b> AG                                                   | PBG | 1321 | GATGTGCACGAACGGATCTCAGGAGTGTACTGGGTTCTCCGAAC <b>CTGGGGAAGTATG</b> TA                                      |
| oG  | 361 | AT <b>GGCTGGC</b> GACCC <b>CGCTAT</b> GAGGAA <b>AGCCTG</b> CACAAT <b>CCTTACCCAGAC</b> TAT <b>CATTGG</b>                | oG  | 1381 | <b>CTGCTCTCCG</b> TGGAG <b>CACTGACTGCTCTC</b> AT <b>GTGATC</b> ATTTTCTGAT <b>ACCTG</b> CTGG               |
| PBG | 361 | ATGGCCGGTGACCCAGATATGAAGAGTCTCTACACAATCCGTACCTGACTACCACTGG                                                             | PBG | 1381 | TTACTGAGTGACGGGCCCTGACTGCCCTTGATGTTGATAATTTTCTGATGACATGCTGG                                               |
| oG  | 421 | <b>CTGCGC</b> ACT <b>GTGA</b> AGACC <b>ACAAA</b> GAG <b>AGCCTGGT</b> CAT <b>TTTCC</b> CCAT <b>CTGTGCGCCGAC</b>         | oG  | 1441 | <b>CGACGAGTGA</b> ACCG <b>CTCCGACCACTCAG</b> CACAAT <b>CTGAGG</b> GGG <b>ACCGCTAGAGA</b> AGTG             |
| PBG | 421 | CTTCGAAC <b>TGTA</b> AAAAC <b>CAAGGAGTCTCTCGTTATCATATCTCCA</b> AGTGTGGCAGAT                                            | PBG | 1441 | AGAAGAGTCAATCGATCAGAACCTACGCAACACAATCTCAGAGGGACAGGGAGGGAGTG                                               |
| oG  | 481 | <b>CTG</b> GACCC <b>TACG</b> CCG <b>ATCTCTCC</b> ACAG <b>TCCAGT</b> TT <b>TTCC</b> GGC <b>GGA</b> ACT <b>GTCC</b> GGGA | oG  | 1501 | <b>TCTGT</b> CACACCC <b>CAGAGCGGTA</b> AAAT <b>CATCAGCAGT</b> TTGGAA <b>AGTCATAAATCT</b> GGGGC            |
| PBG | 481 | TTGGACCATATGACAGATCCCTTCACTCGCCGGTCTTCCCTGGCGGAATTGCTCAGGA                                                             | PBG | 1501 | TCA <b>GTCACT</b> CCCCAAAGCGGGAAGATCATATCTTCA <b>TTGGAATCACACA</b> AGAGTGGGGT                             |
| oG  | 541 | <b>GTGGCCGT</b> CAG <b>CTC</b> CACTTACT <b>GTTC</b> ACC <b>AA</b> CTGAT <b>TATACA</b> ACTGGAT <b>GCCTG</b> AG          | oG  | 1561 | GAG <b>ACACGGCT</b> CTAA                                                                                  |
| PBG | 541 | GTAGCGGTGCTTCTACTACTGTCTC <b>ACTA</b> ACCA <b>GCAG</b> ATTAGACCA <b>TTTGGATGCC</b> CGAG                                | PBG | 1561 | GAGACCAGACTGTAA                                                                                           |
| oG  | 601 | AAT <b>CCAAGGCT</b> GGGGAT <b>GTCTGCG</b> GACAT <b>TTCA</b> CC <b>AA</b> CAGCAGGGG <b>CAAGAGGGC</b> CTCA               |     |      |                                                                                                           |
| PBG | 601 | AATCCGAGACTAGGGATGCTTGTGACATTTTACCAATAGTAGAGGGAAGAGAGCATCC                                                             |     |      |                                                                                                           |
| oG  | 661 | AAA <b>GGCAGC</b> GAGACT <b>TTGGATTT</b> GTGGATGAAAG <b>GGGCTG</b> TATAAG <b>AGCCTCAA</b> AGGT                         |     |      |                                                                                                           |
| PBG | 661 | AAAGGGAGTGAGACTTGGCGCTTTGTAGATGAAAGAGGCCTATATAAGTCTTTAAAGGA                                                            |     |      |                                                                                                           |
| oG  | 721 | <b>GCCTGCAAGT</b> GAA <b>ACTTGT</b> GGC <b>GTGCTGGGA</b> CT <b>CGGCTG</b> AT <b>GGAC</b> GGAA <b>ACTTGGG</b> TC        |     |      |                                                                                                           |
| PBG | 721 | GCATGCAAACTCAAGTTATGTGGAGTTCTAGGACTTAGACTTATGGATGGAACATGGGTC                                                           |     |      |                                                                                                           |
| oG  | 781 | <b>GCTATGCAGAC</b> ACT <b>CTAACG</b> AGACTAAGTGGTGC <b>CCCCCTGGG</b> CAG <b>CTCGTGAATCTG</b> CAC                       |     |      |                                                                                                           |
| PBG | 781 | GCATGCAAAACATCAAATGAAACCAATGGTGCCTCCCGTCAAGTGGTGAATTTGCAC                                                              |     |      |                                                                                                           |
| oG  | 841 | GACT <b>TTCCGAAGCGAT</b> GAGAT <b>CGAACATCTGGTGTG</b> GAG <b>GA</b> ACT <b>CGTGA</b> AGAAA <b>AGGGAG</b>               |     |      |                                                                                                           |
| PBG | 841 | GACTTTCGCTCAGACGAAATTGAGCACCTTGTGTAGAGGAGTTGGTCAAGAAAGAGAGAG                                                           |     |      |                                                                                                           |
| oG  | 901 | <b>GAA</b> TG <b>CTCGATGCTCTG</b> GAG <b>TCAATTATGACT</b> ACCAAG <b>AGCTGAGCTT</b> CAGGAG <b>GGCTG</b>                 |     |      |                                                                                                           |
| PBG | 901 | GAGTGTCTGGATGCACTAGAGTCCATCATGACCACCAAGTCAAGTTCAGACGTCTC                                                               |     |      |                                                                                                           |
| oG  | 961 | <b>AGCCACCTGAGGAAGCT</b> CGTCC <b>CTGGCTT</b> GGAAAAG <b>CATAC</b> ACC <b>ATCTTTAACA</b> AGACA                         |     |      |                                                                                                           |
| PBG | 961 | AGTCATTTAAGAAA <b>ACTTGTCCCTGGGTTTGGAAA</b> AGCATATACCATATTCAACAAGACC                                                  |     |      |                                                                                                           |

Figure S1. DNA alignment between oG and PBG, Related to Figure 1. Base pairs oG optimized for *Mus musculus* are colored red.

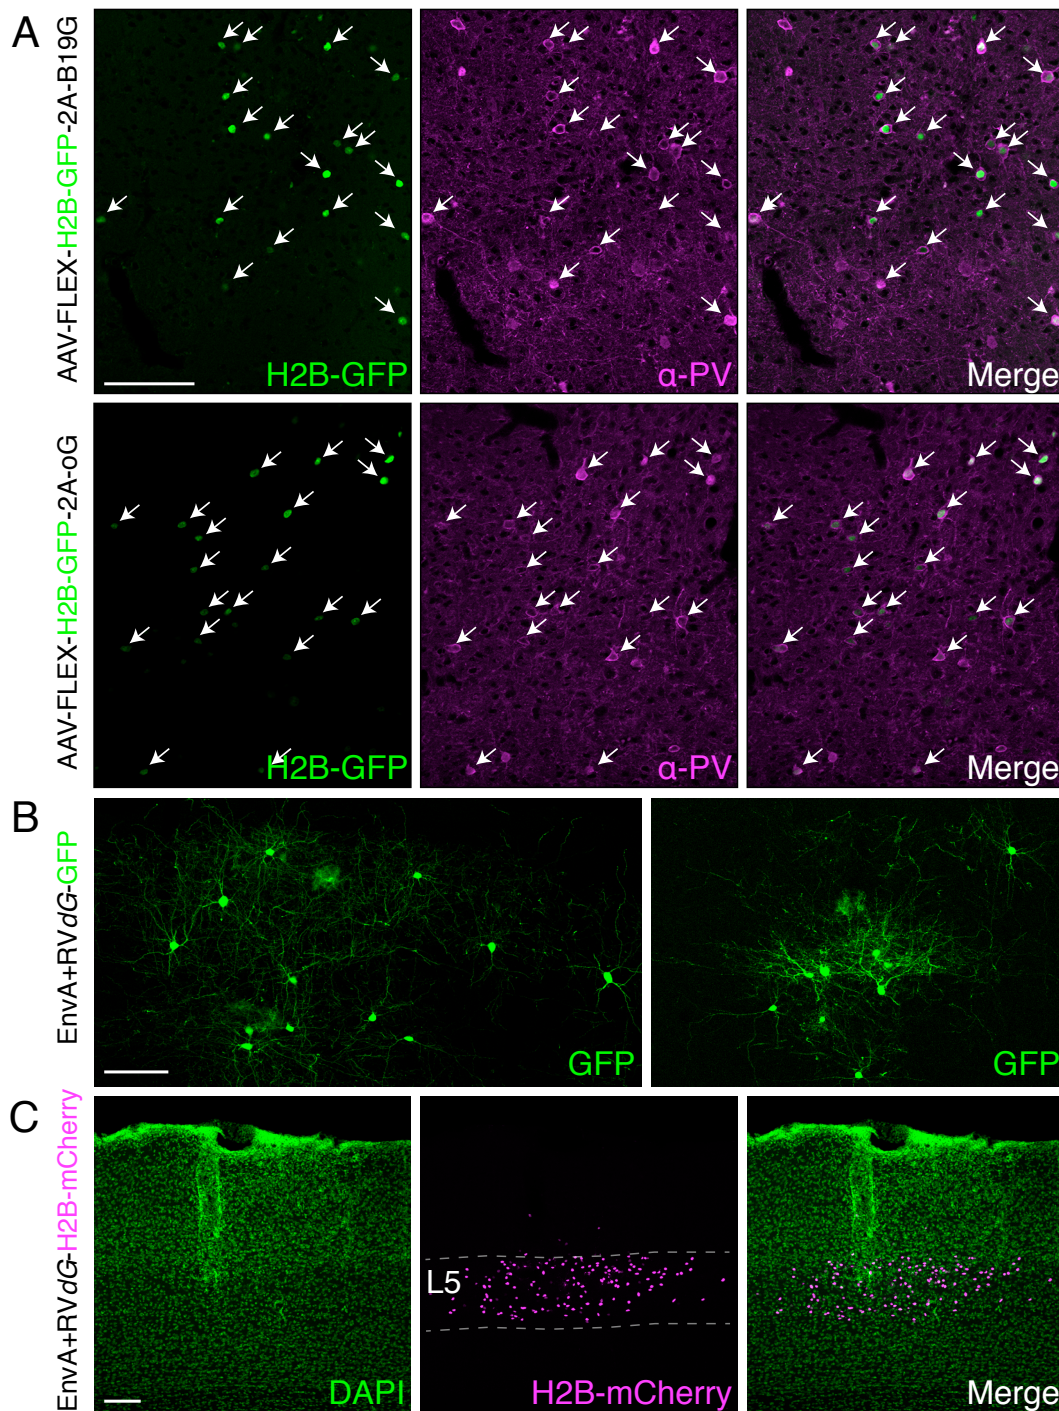

**Figure S2. Tight control of transgene expression from AAV-FLEX-H2B-GFP-2A-G viral vectors and  $R26^{LSL-TVA/+}$  mice, and selectivity of EnvA-RVdG infection, Related to Figure 3.** (A) Coronal sections of V1 in  $PV^{IRES-Cre/+};R26^{LSL-TVA/+}$  mouse showing that H2B-GFP expression from AAV-FLEX-H2B-GFP-2A-B19G (top panels) or AAV-FLEX-H2B-GFP-2A-oG (bottom panels) is co-localized with PV antibody staining (magenta) in PV-Cre neurons. These data demonstrate selective expression of glycoproteins from these AAV constructs only in PV<sup>+</sup> neurons and no leak expression in other cell types. (B) Following injection of EnvA-RVdG-GFP into the visual cortex of  $PV^{IRES-Cre/+};R26^{LSL-TVA/+}$  mouse, GFP is expressed only in neurons with PV inhibitory neuron morphologies; no pyramidal neurons are seen. These data demonstrate a lack of TVA expression in cells that do not express Cre in the  $R26^{LSL-TVA/+}$  mice. (C) Following injection of EnvA+RVdG-H2B-mCherry in the V1 cortex of  $Tlx3-Cre/+;R26^{LSL-TVA/+}$  mouse, mCherry (magenta) is seen exclusively in the nuclei of layer 5 cells, as expected from the exclusive expression of Cre within layer 5 of  $Tlx3-Cre$  mice. These data further demonstrate a lack of TVA expression in cells that do not express Cre in the  $R26^{LSL-TVA/+}$  mice. Scale bars = 100  $\mu$ m (A-C).

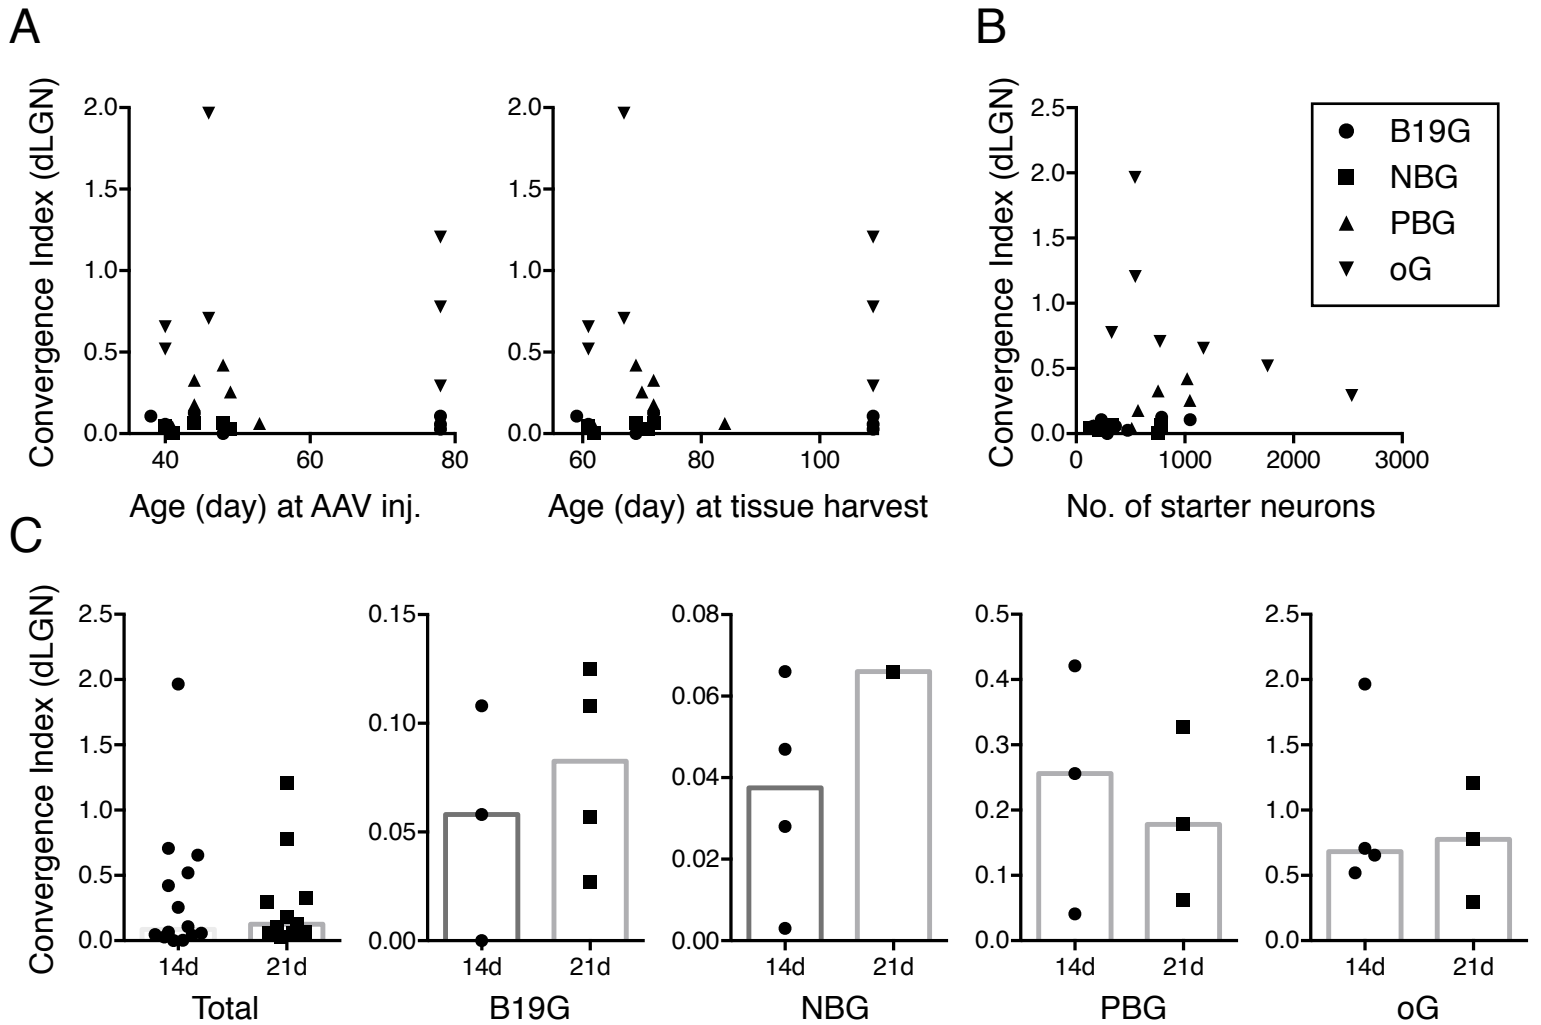

**Figure S3. Animal ages, numbers of starter neurons, and duration of AAV expression before rabies infection do not affect virus tracing efficiency, Related to Figure 4.** (A) dLGN convergence indices plotted against the age of animals when AAV helper was injected (left panel) or when the tissues were harvested (right panel). Each data point indicates the convergence index from a single animal and symbols indicate different glycoproteins used for complementation according to the legend in B. (B) dLGN convergence indices plotted against the numbers of starter neurons for each animal, as in A. (C) dLGN convergence indices plotted against duration of AAV expression (14 or 21 days) prior to EnvA+RVdG-dsRed injection. Each data point corresponds to a single animal and gray bars indicate medians. Circular symbols correspond to 14 days survival and squares to 21 days. Data are plotted separately for all experiments combined (left panel) as well as independently sorted according to the glycoprotein variant tested (B19G, NBG, PBG, or oG). There is no correlation between dLGN convergence index and time between AAV and RV injections.

| Glycoprotein | Sex | Age | AAV | # Starter | # dLGN | CI dLGN | # LP | CI LP |
|--------------|-----|-----|-----|-----------|--------|---------|------|-------|
| B19G         | M   | 109 | 21  | 157       | 9      | 0.057   | 2    | 0.013 |
| B19G         | M   | 109 | 21  | 231       | 25     | 0.108   | 2    | 0.009 |
| B19G         | M   | 69  | 14  | 285       | 0      | 0       | 0    | 0     |
| B19G         | F   | 61  | 14  | 361       | 21     | 0.058   | 6    | 0.017 |
| B19G         | M   | 109 | 21  | 474       | 13     | 0.027   | 0    | 0     |
| B19G         | M   | 72  | 21  | 786       | 98     | 0.125   | 14   | 0.018 |
| B19G         | F   | 59  | 14  | 1049      | 113    | 0.108   | 5    | 0.005 |
|              |     |     |     |           |        |         |      |       |
| NBG          | F   | 61  | 14  | 128       | 6      | 0.047   | 0    | 0     |
| NBG          | F   | 71  | 14  | 211       | 6      | 0.028   | 0    | 0     |
| NBG          | F   | 72  | 21  | 333       | 22     | 0.066   | 0    | 0     |
| NBG          | M   | 62  | 14  | 755       | 2      | 0.003   | 0    | 0     |
| NBG          | M   | 69  | 14  | 775       | 51     | 0.066   | 6    | 0.008 |
|              |     |     |     |           |        |         |      |       |
| PBG          | F   | 84  | 21  | 162       | 10     | 0.062   | 1    | 0.006 |
| PBG          | M   | 62  | 14  | 512       | 21     | 0.041   | 1    | 0.002 |
| PBG          | F   | 72  | 21  | 568       | 101    | 0.178   | 22   | 0.039 |
| PBG          | M   | 72  | 21  | 754       | 247    | 0.328   | 21   | 0.028 |
| PBG          | M   | 69  | 14  | 1021      | 430    | 0.421   | 32   | 0.031 |
| PBG          | F   | 70  | 14  | 1045      | 268    | 0.256   | 13   | 0.012 |
|              |     |     |     |           |        |         |      |       |
| oG           | F   | 109 | 21  | 327       | 254    | 0.777   | 18   | 0.055 |
| oG           | M   | 67  | 14  | 540       | 1061   | 1.965   | 216  | 0.400 |
| oG           | F   | 109 | 21  | 543       | 655    | 1.206   | 208  | 0.383 |
| oG           | M   | 67  | 14  | 770       | 544    | 0.707   | 149  | 0.194 |
| oG           | F   | 61  | 14  | 1170      | 768    | 0.656   | 80   | 0.068 |
| oG           | F   | 61  | 14  | 1762      | 914    | 0.519   | 162  | 0.092 |
| oG           | M   | 109 | 21  | 2536      | 741    | 0.292   | 153  | 0.060 |

**Table S1. List of  $PV^{IRES-Cre/+};R26^{LSL-TV\Delta/+}$  mice for quantification of rabies tracing, Related to Figures 3 and 4.** Age indicates when tissues were harvested (day). AAV indicates duration of AAV expression (14 or 21 days) prior to EnvA+RVdG-dsRed injection. Abbreviation: CI, Convergence Index.
